# Supplementary material for: One-Year Mortality in Patients Undergoing Transcatheter Aortic Valve Replacement for Stenotic Bicuspid versus Tricuspid Aortic Valves: A Meta-Analysis and Meta-Regression
Source: Hindawi journal article supplement (doi:10.1155/2019/8947204), 2019-01-02
Supplement: f1 [file 8947204.f1.pdf]

**Supplemental Material:**

**Funnel plots for 30 day outcomes:**

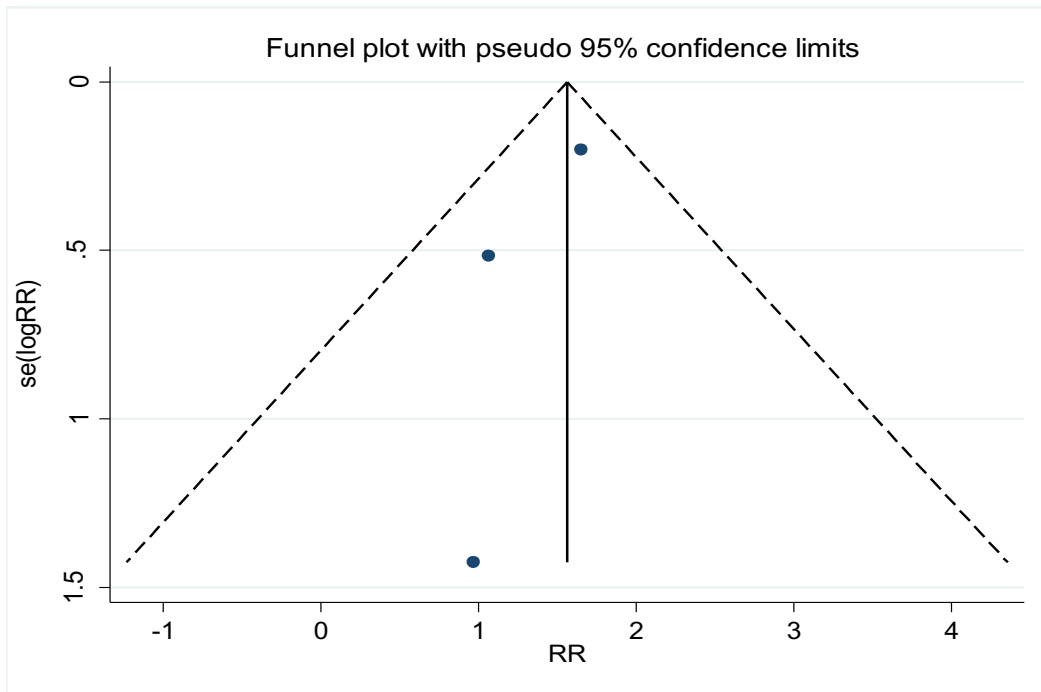

**Figure S1 Funnel plot for 30-day Post-TAVR moderate to severe prosthetic valve regurgitation**

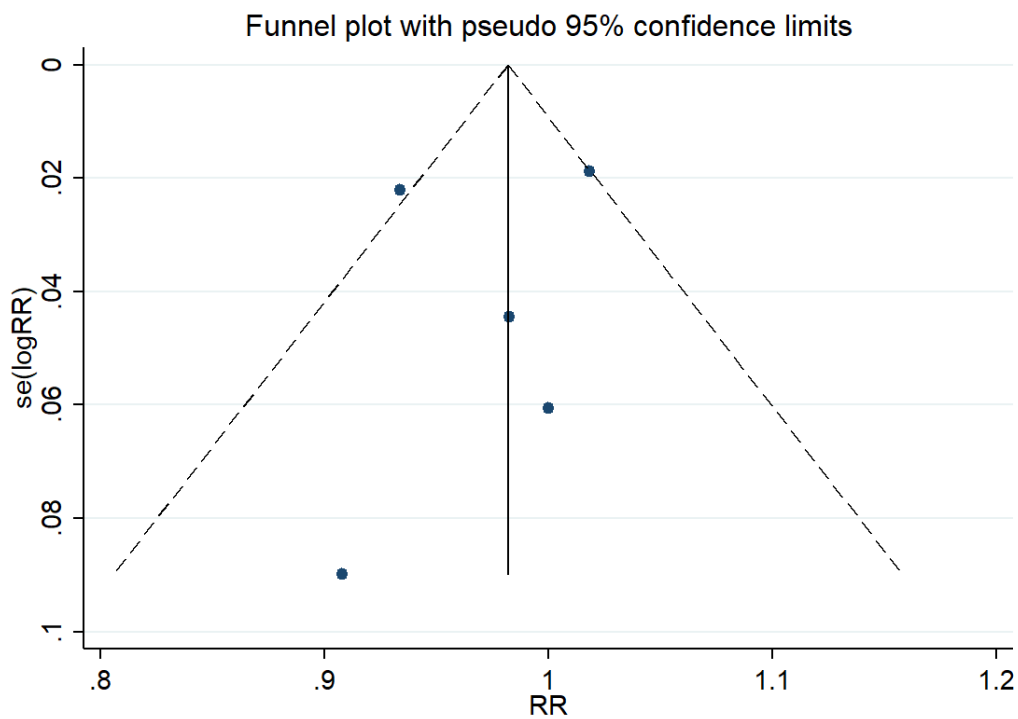

**Figure S2 Funnel plot for 30-day Post-TAVR composite device success**

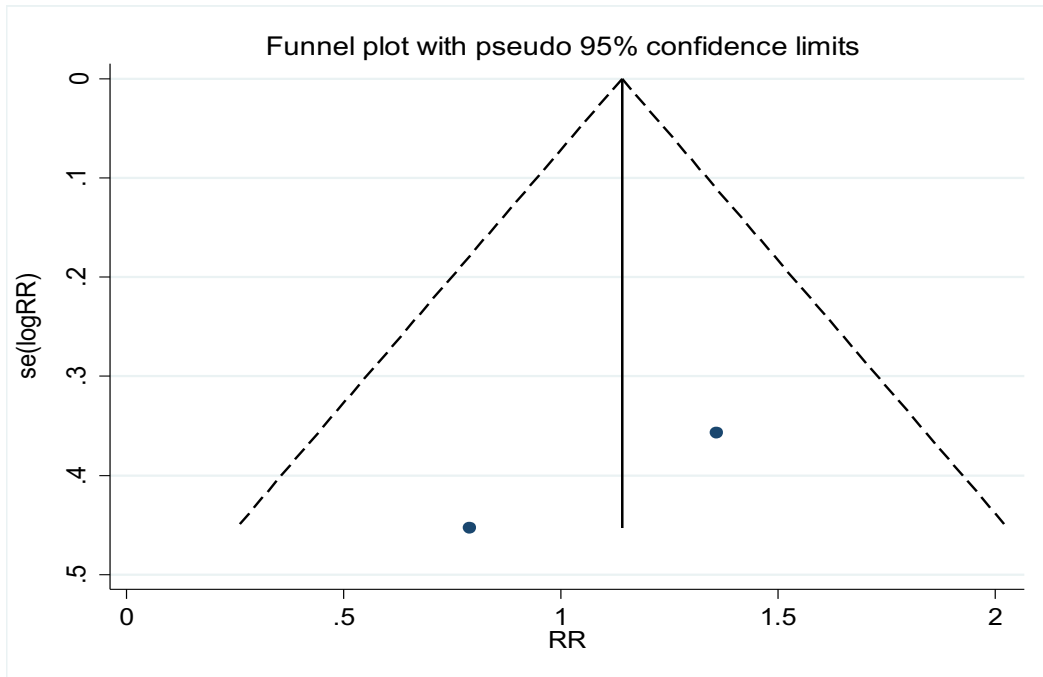

Figure S3 Funnel plot for 30-day Post-TAVR composite safety

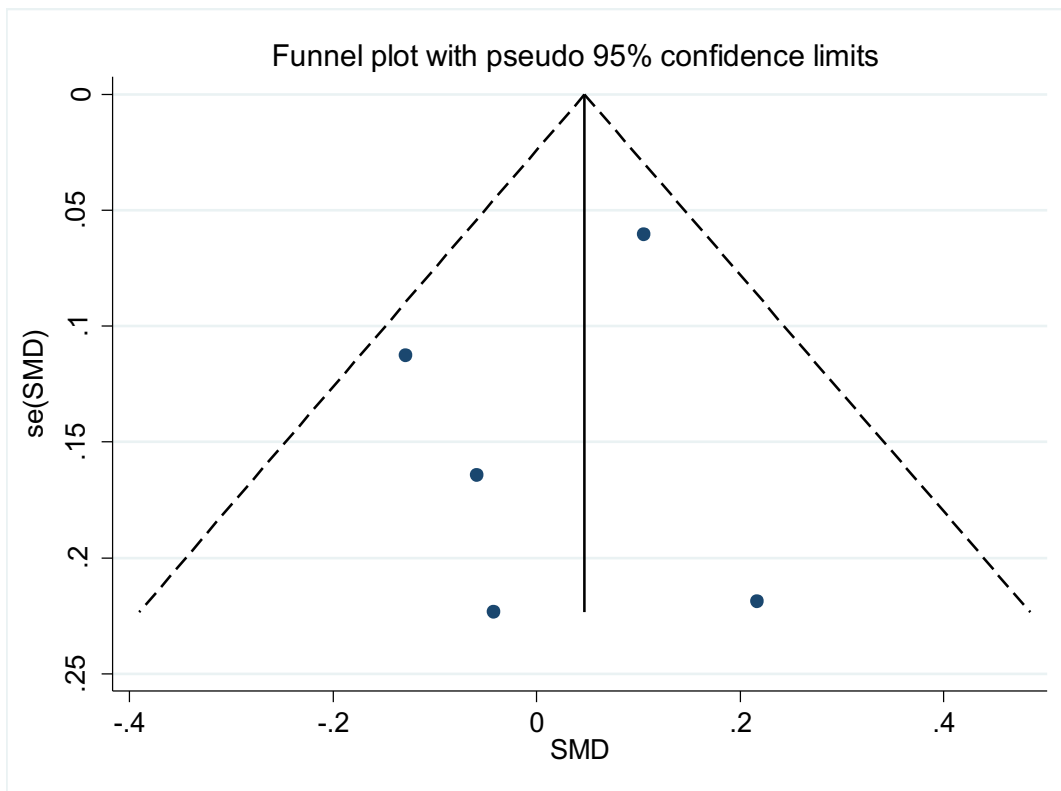

Figure S4 Funnel plot for 30-day Post-TAVR mean aortic gradient

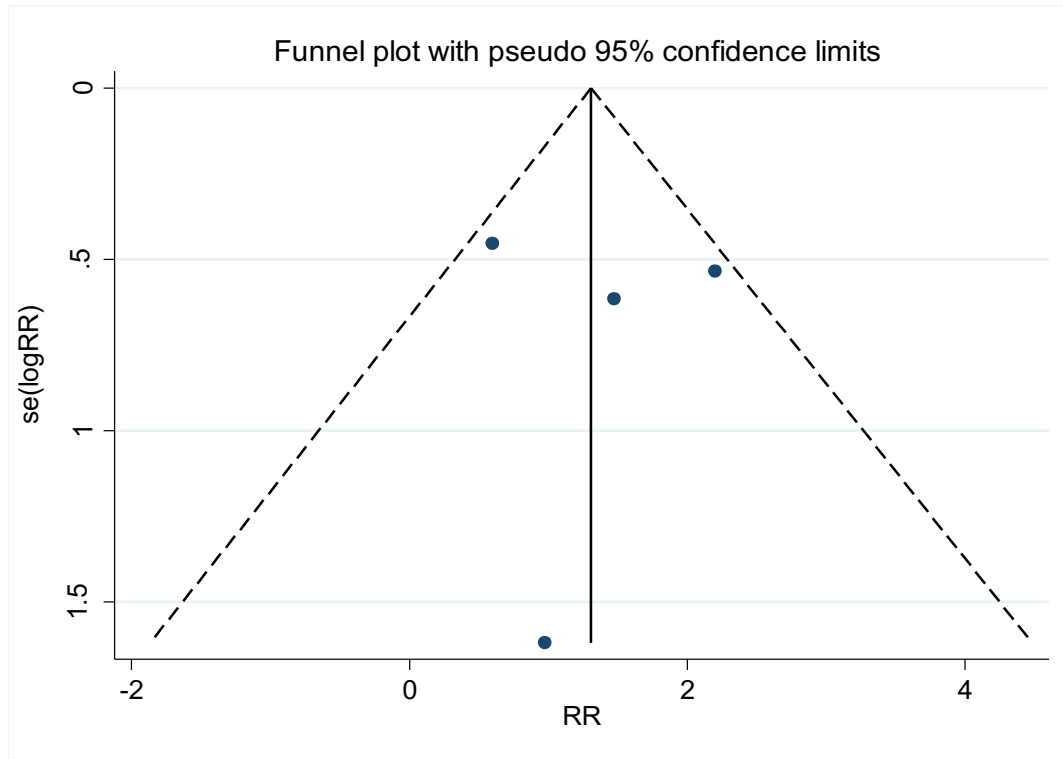

**Figure S5 Funnel plot for 30-day Post-TAVR acute kidney injury**

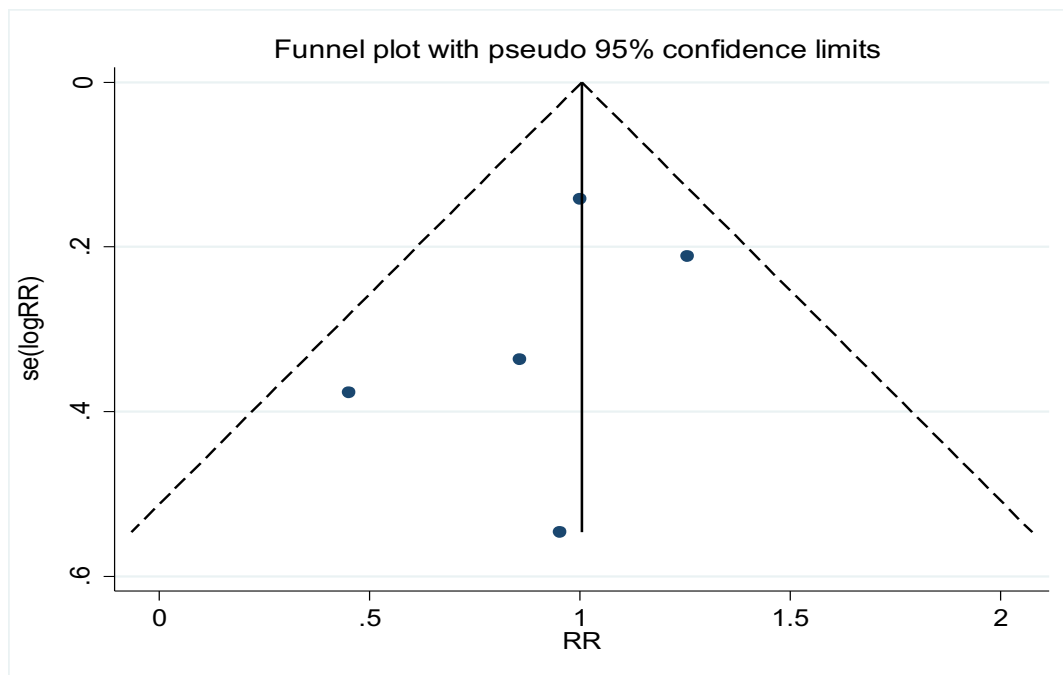

**Figure S6 Funnel plot for 30-day Post-TAVR permanent pacemaker implantation**

Meta-regression analysis by representative plots:

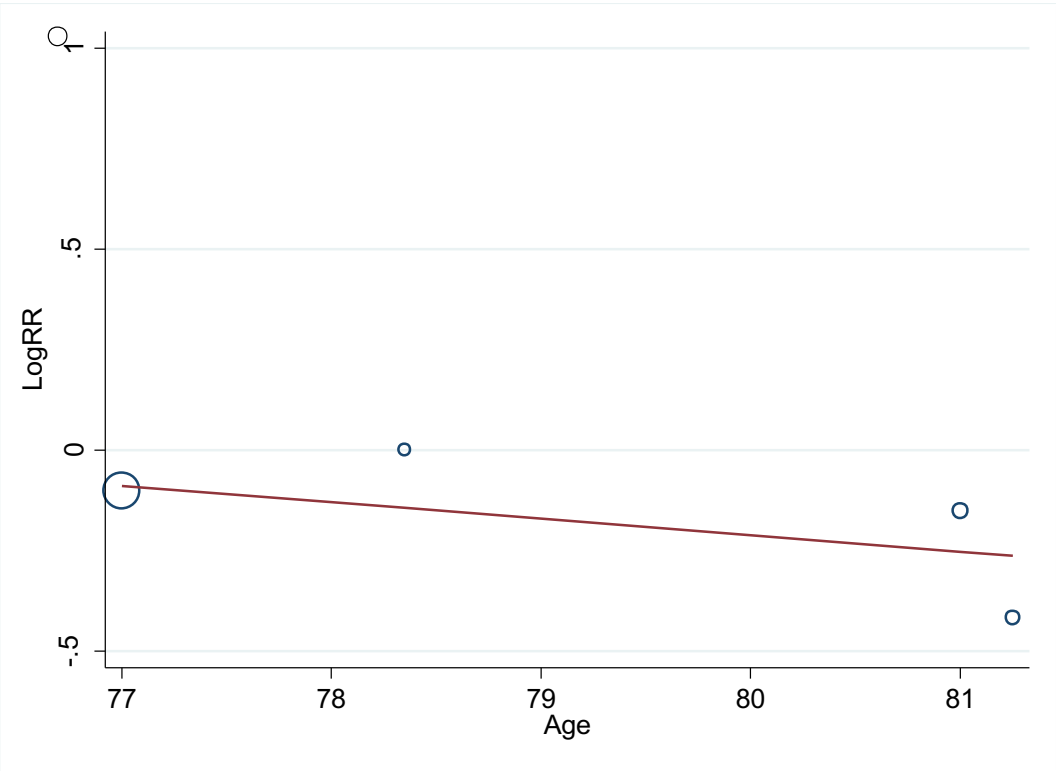

Figure S7 Meta-regression representative bubble plot for mean age

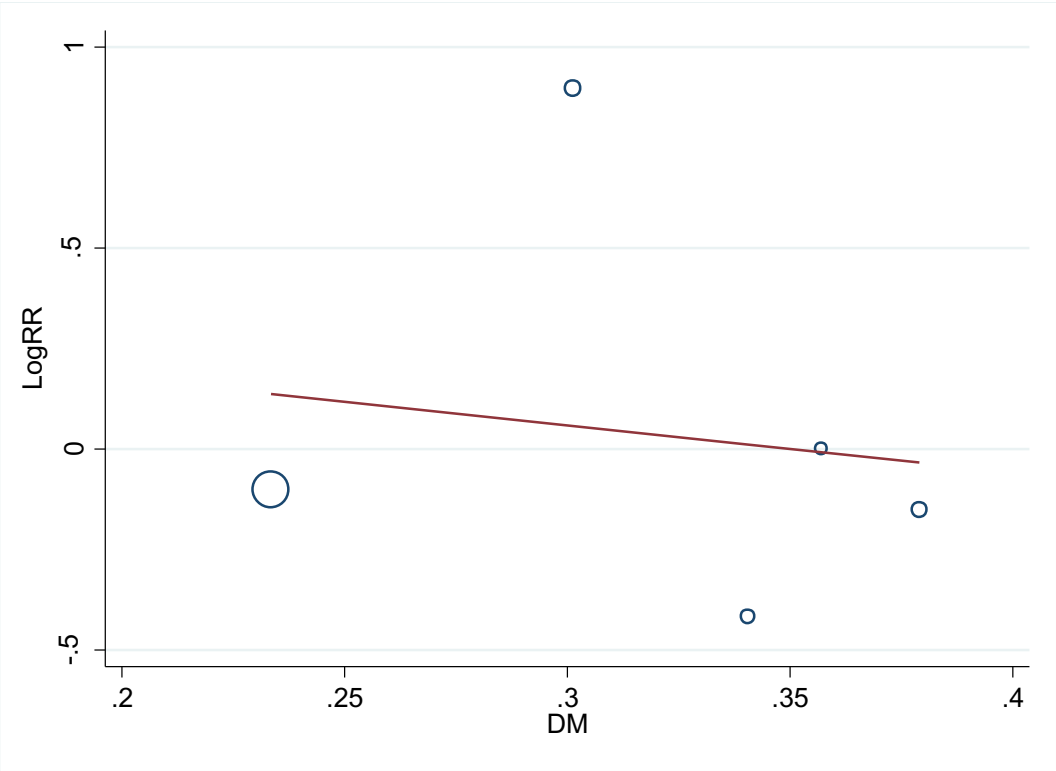

Figure S8 Meta-regression representative bubble plot for diabetes mellitus

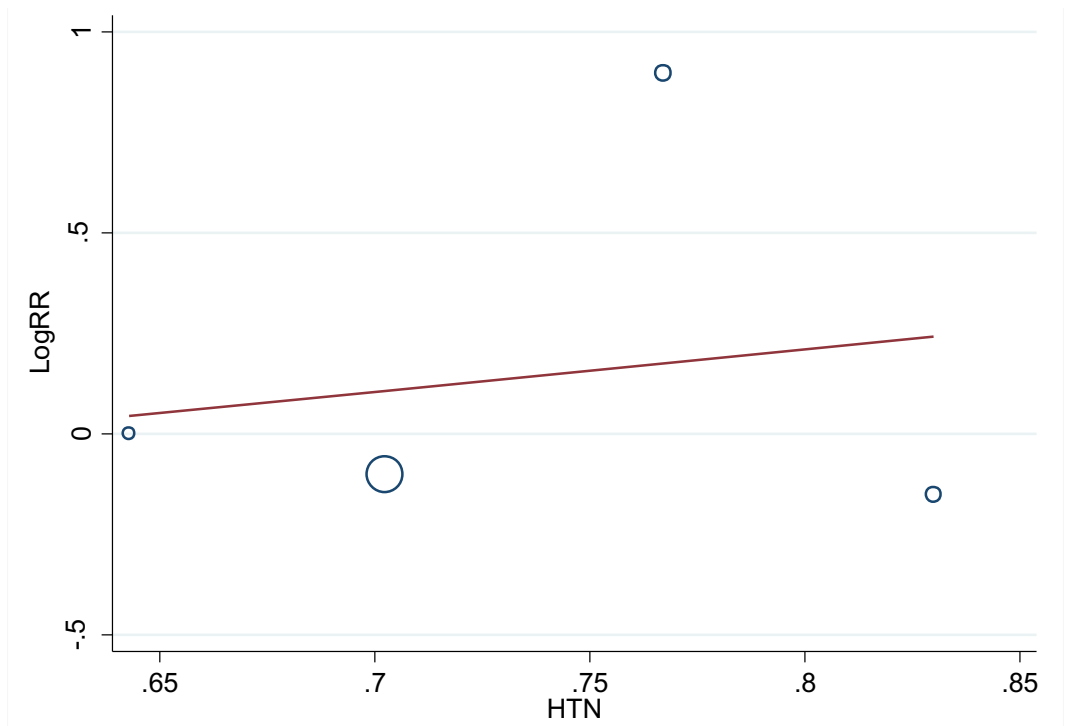

**Figure S9 Meta-regression representative bubble plot for hypertension**

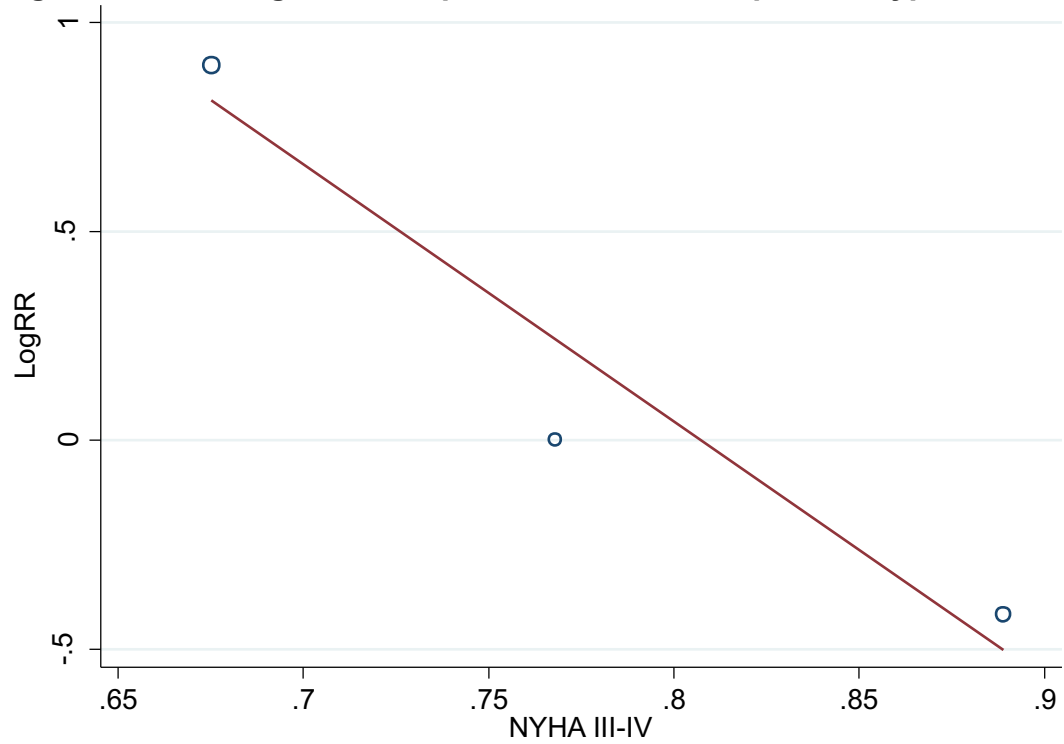

**Figure S10 Meta-regression representative bubble plot for heart failure with NYHA III-IV symptoms**

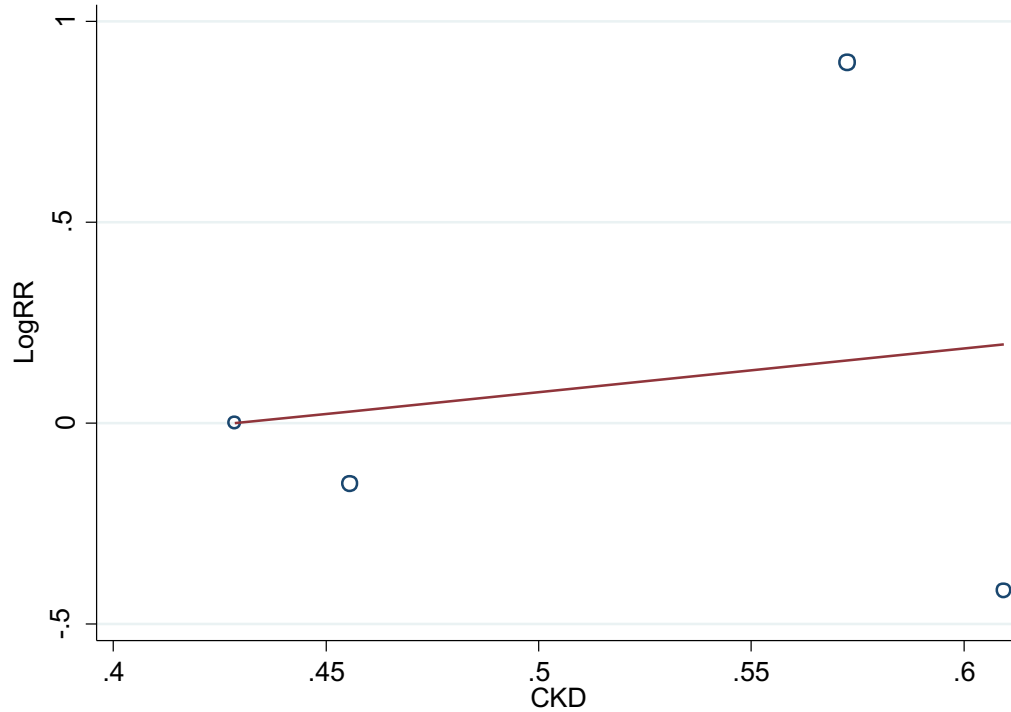

**Figure S11 Meta-regression representative bubble plot for chronic kidney disease (GFR <60 ml/min/1.73 m<sup>2</sup>)**

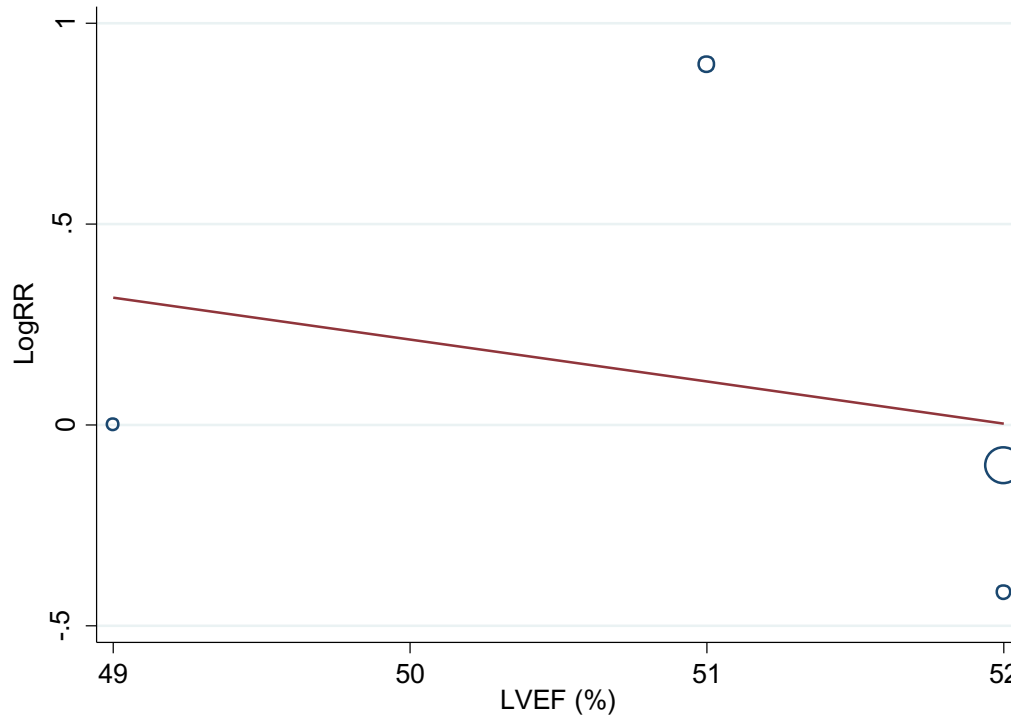

**Figure S12 Meta-regression representative bubble plot for mean left ventricle ejection fraction (LVEF, %)**

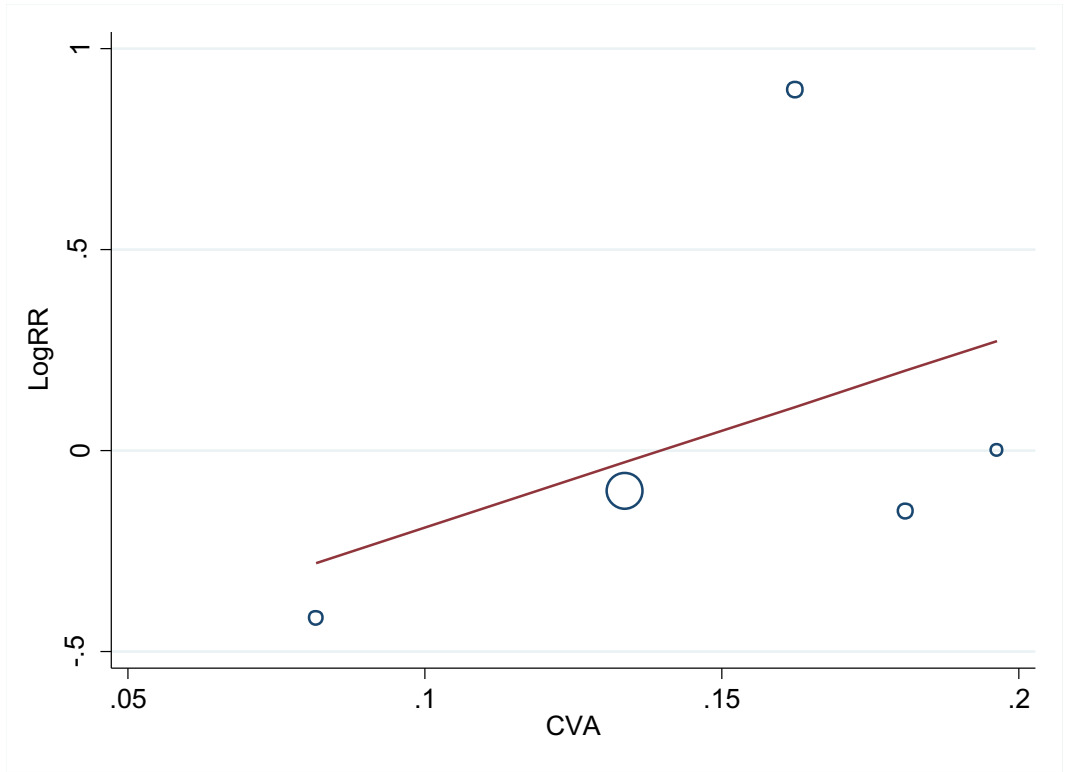

**Figure S13 Meta-regression representative bubble plot for previous cerebrovascular accident (CVA)**

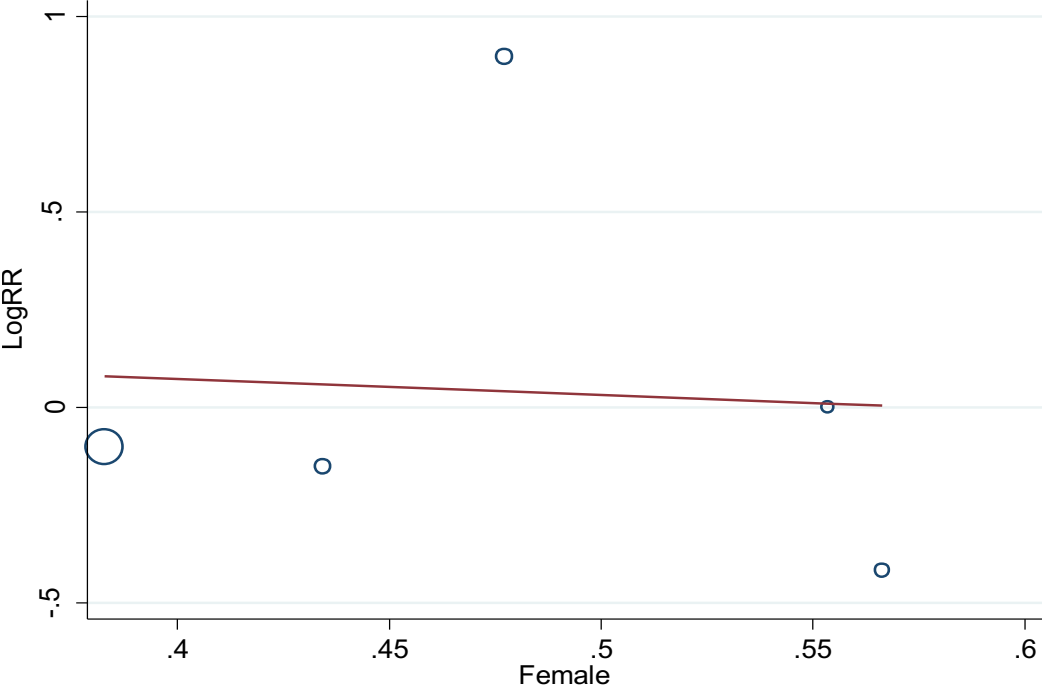

**Figure S14 Meta-regression representative bubble plot for female gender**

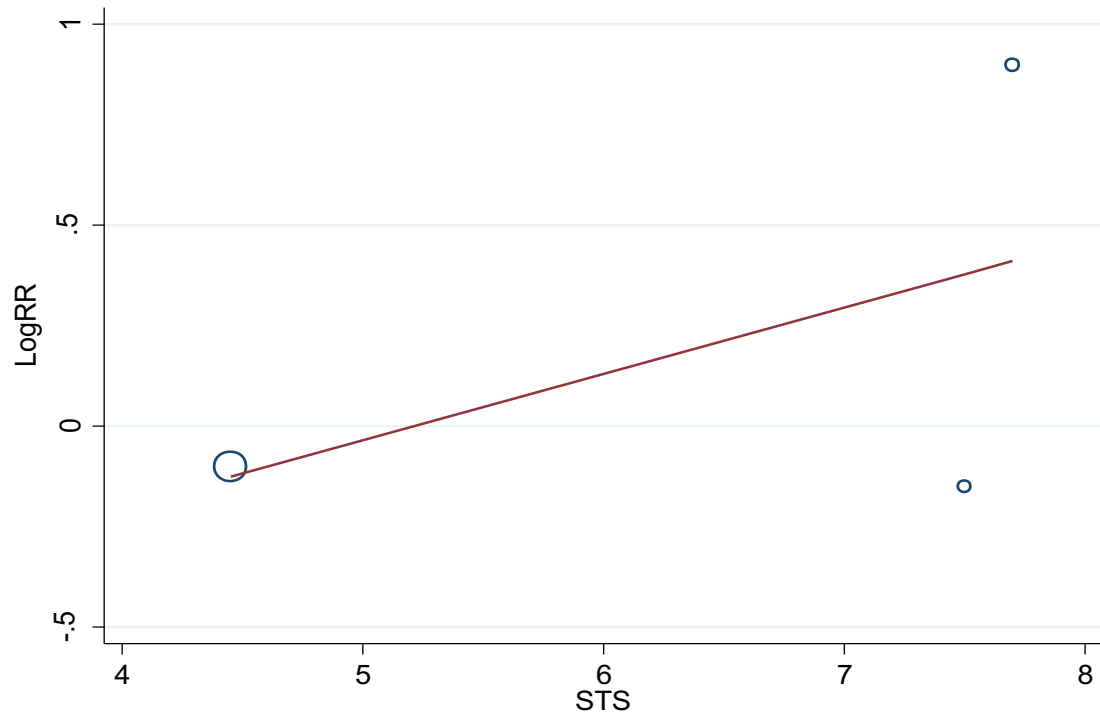

**Figure S15 Meta-regression representative bubble plot for STS score**

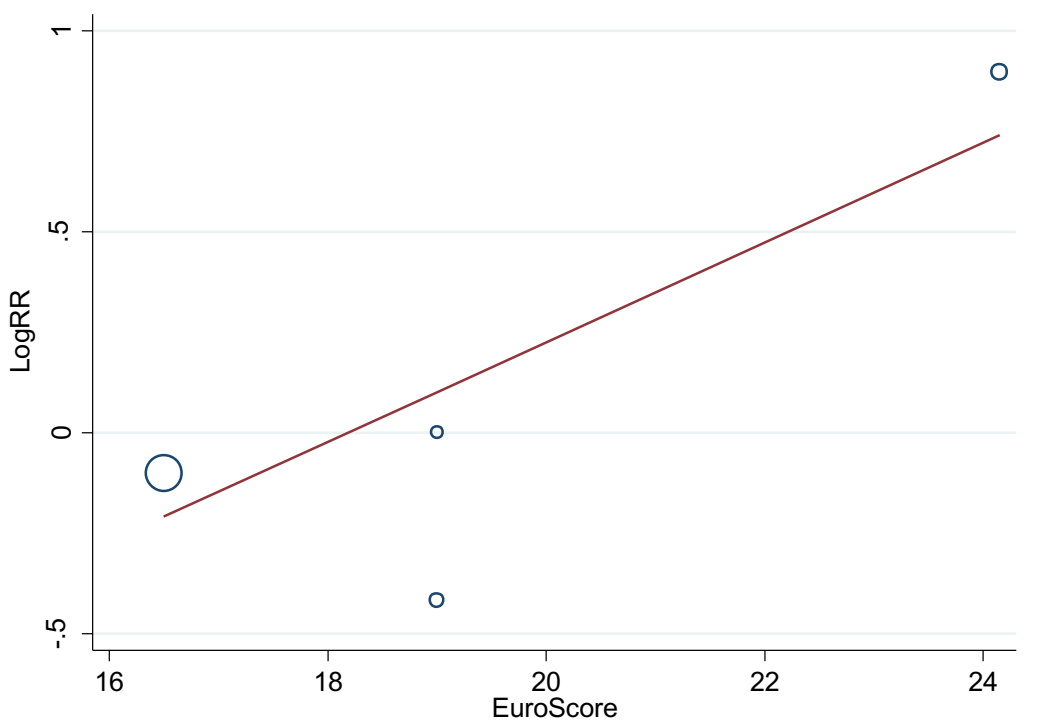

**Figure S16 Meta-regression representative bubble plot for EuroScore**



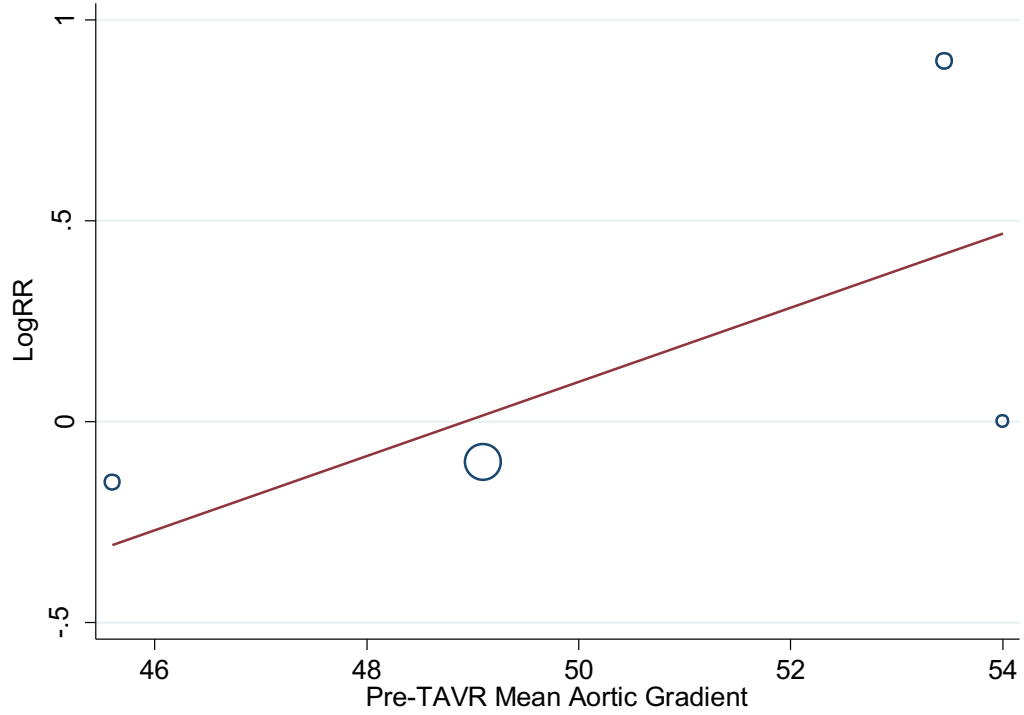

**Figure S17 Meta-regression representative bubble plot for pre-TAVR Mean Aortic Gradient**

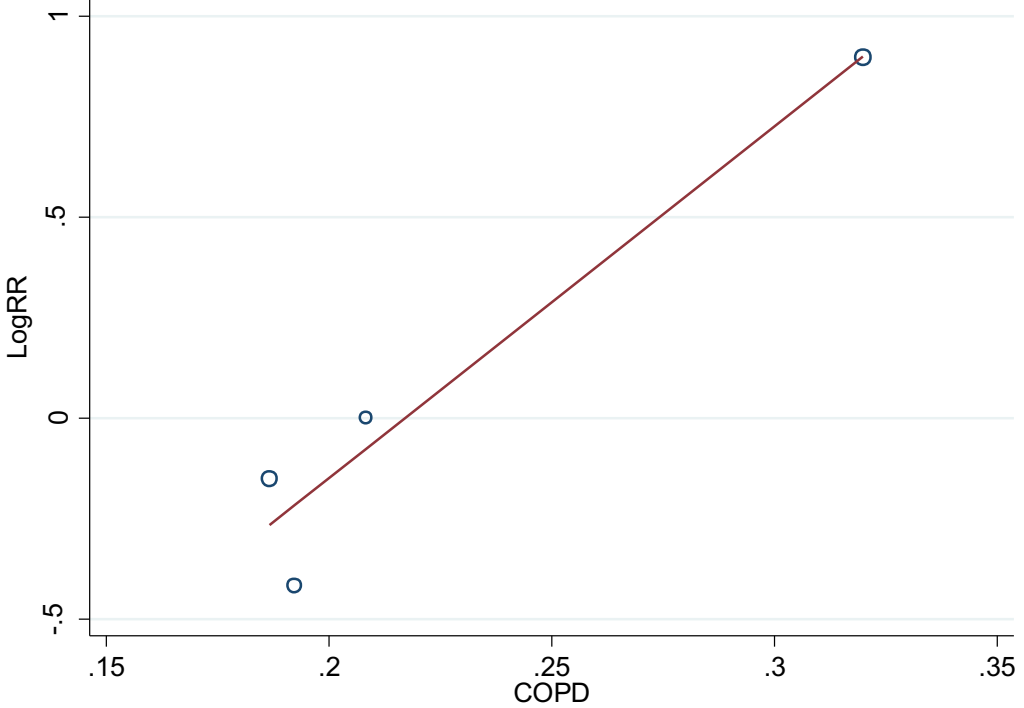

**Figure S18 Meta-regression representative bubble plot for Chronic Obstructive Pulmonary Disease (COPD)**

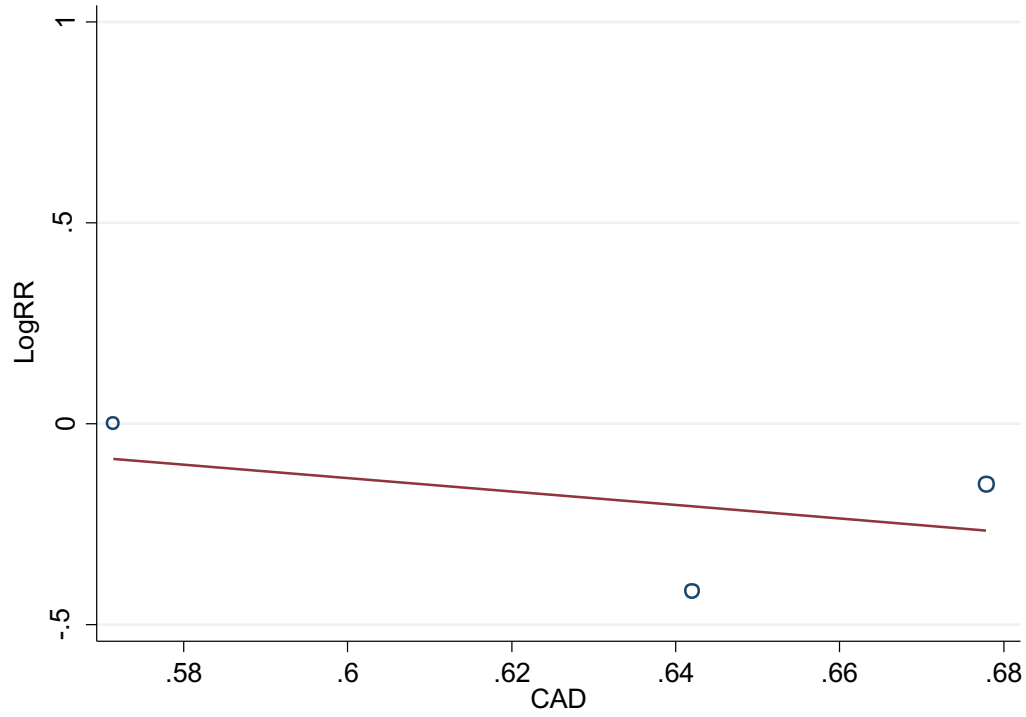

**Figure S19 Meta-regression representative bubble plot for Coronary Artery Disease (CAD)**

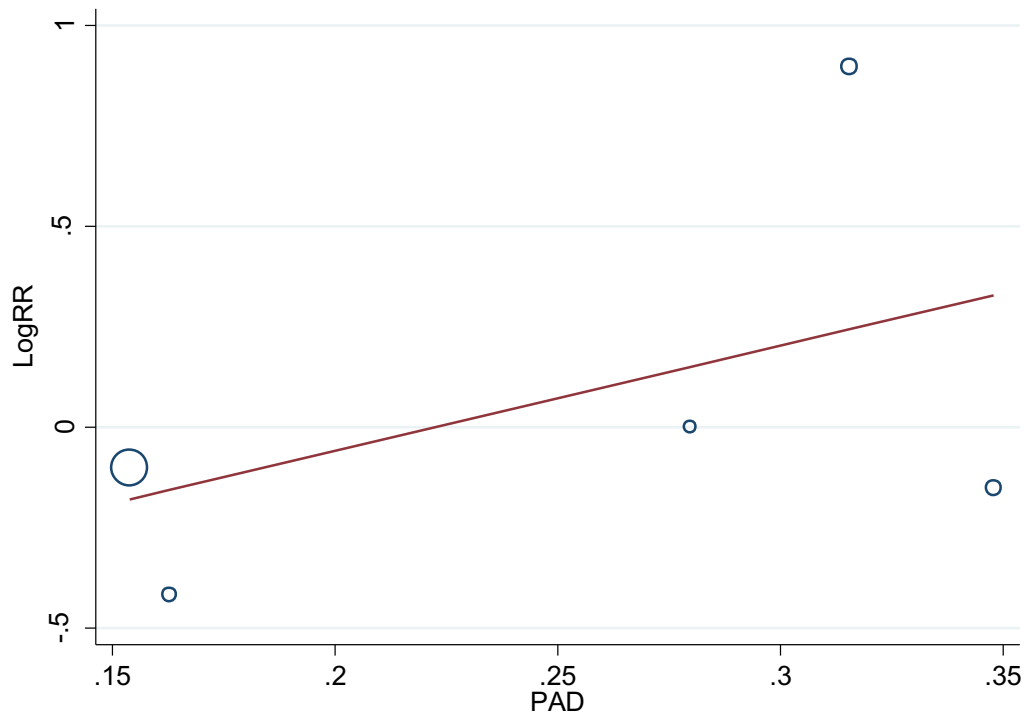

**Figure S20 Meta-regression representative bubble plot for Peripheral Artery Disease (PAD)**

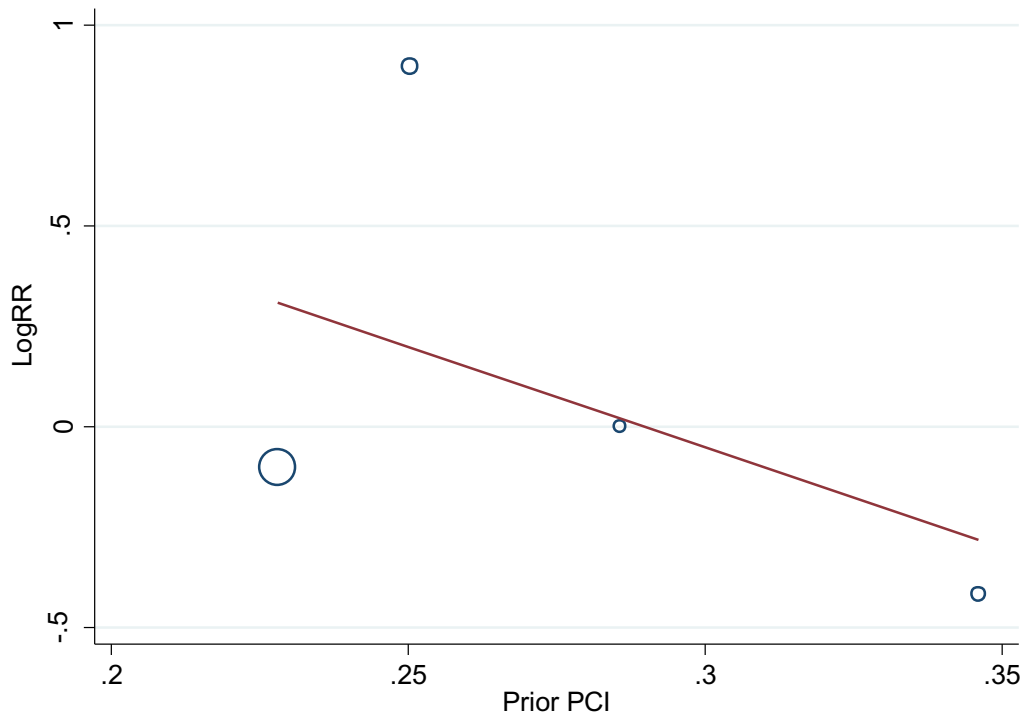

**Figure S21 Meta-regression representative bubble plot for prior Percutaneous Coronary Intervention (PCI)**

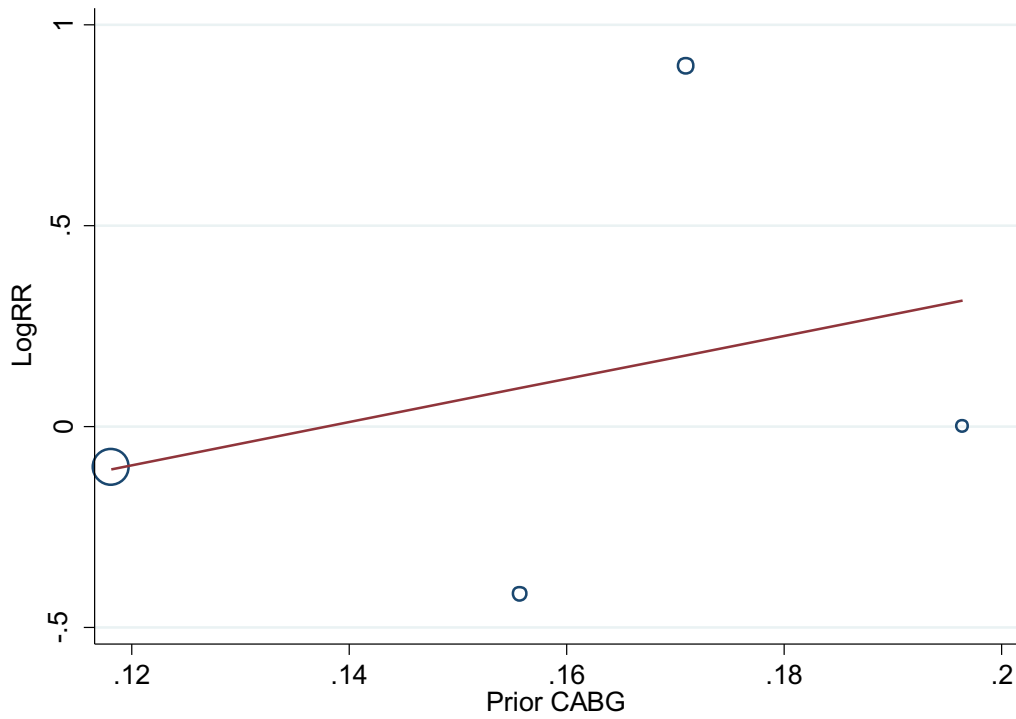

**Figure S22 Meta-regression representative bubble plot for prior Coronary Artery Bypass Graft (CABG)**
